# Supplementary material for: A Novel Pyroptosis-Related Prognostic Signature for Risk Stratification and Clinical Prognosis in Clear Cell Renal Cell Carcinoma
Source: PubMed Central journal article supplement (PMC8927973; doi:10.1155/2022/8093837), 2022-03-09
Supplement: 8093837.f1.pdf [file 8093837.f1.pdf]

**Table S1.** Univariate Cox regression analysis for identification of prognosis-related PRGs in the training dataset.

| ID     | HR     | HR.95L | HR.95H  | p-value   |
|--------|--------|--------|---------|-----------|
| LRPPRC | 0.408  | 0.285  | 0.584   | 9.470E-07 |
| SDHB   | 0.297  | 0.180  | 0.489   | 1.890E-06 |
| TXNIP  | 0.583  | 0.457  | 0.743   | 1.290E-05 |
| IRF3   | 2.432  | 1.631  | 3.628   | 1.320E-05 |
| CEBPB  | 1.538  | 1.267  | 1.867   | 1.350E-05 |
| GSDMB  | 1.831  | 1.394  | 2.405   | 1.390E-05 |
| DHX9   | 0.441  | 0.305  | 0.639   | 1.460E-05 |
| NFKB1  | 0.478  | 0.337  | 0.676   | 3.140E-05 |
| TFAM   | 0.369  | 0.230  | 0.592   | 3.460E-05 |
| PECAM1 | 0.708  | 0.595  | 0.841   | 8.820E-05 |
| BCL2   | 0.663  | 0.537  | 0.819   | 1.401E-04 |
| PYCARD | 1.493  | 1.197  | 1.861   | 3.767E-04 |
| BNIP3  | 0.675  | 0.542  | 0.841   | 4.469E-04 |
| BECN1  | 0.500  | 0.339  | 0.737   | 4.649E-04 |
| AGER   | 1.490  | 1.191  | 1.863   | 4.770E-04 |
| CASP9  | 2.530  | 1.486  | 4.310   | 6.335E-04 |
| GJA1   | 0.746  | 0.624  | 0.893   | 1.368E-03 |
| ATF6   | 0.507  | 0.333  | 0.771   | 1.508E-03 |
| HUWE1  | 0.584  | 0.419  | 0.815   | 1.548E-03 |
| CASP4  | 2.053  | 1.314  | 3.206   | 1.575E-03 |
| AIM2   | 1.425  | 1.136  | 1.788   | 2.170E-03 |
| IFI16  | 1.681  | 1.201  | 2.352   | 2.438E-03 |
| IRGM   | 29.534 | 3.041  | 286.850 | 3.514E-03 |
| ZBP1   | 1.619  | 1.171  | 2.238   | 3.553E-03 |
| CASP5  | 2.310  | 1.312  | 4.068   | 3.729E-03 |
| GPER1  | 0.764  | 0.635  | 0.918   | 4.012E-03 |
| EGFR   | 0.723  | 0.571  | 0.915   | 6.927E-03 |
| NFE2L2 | 0.526  | 0.330  | 0.839   | 7.031E-03 |
| CASP3  | 1.956  | 1.177  | 3.249   | 9.611E-03 |
| NR1H2  | 2.206  | 1.187  | 4.100   | 1.233E-02 |
| NLRP1  | 1.471  | 1.081  | 2.000   | 1.399E-02 |
| MEFV   | 1.958  | 1.143  | 3.354   | 1.447E-02 |
| GLMN   | 2.250  | 1.155  | 4.382   | 1.717E-02 |
| LY96   | 1.291  | 1.044  | 1.595   | 1.826E-02 |
| ANO6   | 0.681  | 0.491  | 0.944   | 2.097E-02 |
| IL13   | 32.368 | 1.598  | 655.686 | 2.350E-02 |
| TUBB6  | 1.491  | 1.047  | 2.124   | 2.692E-02 |
| GSDMD  | 1.566  | 1.051  | 2.335   | 2.768E-02 |

|       |       |       |       |           |
|-------|-------|-------|-------|-----------|
| APOL1 | 1.176 | 1.016 | 1.362 | 3.014E-02 |
| CAPN1 | 0.548 | 0.317 | 0.949 | 3.173E-02 |
| GSTO1 | 1.389 | 1.028 | 1.877 | 3.250E-02 |
| BST2  | 1.300 | 1.021 | 1.656 | 3.358E-02 |
| ANXA2 | 1.391 | 1.024 | 1.889 | 3.466E-02 |
| PRDM1 | 0.750 | 0.572 | 0.983 | 3.685E-02 |
| NEK7  | 0.676 | 0.466 | 0.981 | 3.924E-02 |
| CD14  | 1.262 | 1.006 | 1.582 | 4.433E-02 |

---
