# Supplementary material for: A Novel Pyroptosis-Related Prognostic Signature for Risk Stratification and Clinical Prognosis in Clear Cell Renal Cell Carcinoma
Source: PubMed Central journal article supplement (PMC8927973; doi:10.1155/2022/8093837), 2022-03-09
Supplement: 8093837.f2.pdf [file 8093837.f2.pdf]

**Table S2.** 11 prognosis-associated hub PRGs identified by multivariate Cox regression analysis.

| ID    | coef   | HR    | HR.95L | HR.95H | pvalue   |
|-------|--------|-------|--------|--------|----------|
| CASP9 | 1.174  | 3.236 | 1.659  | 6.315  | 5.74E-04 |
| TUBB6 | 0.359  | 1.432 | 1.001  | 2.049  | 4.97E-02 |
| NFKB1 | -0.6   | 0.549 | 0.304  | 0.99   | 4.63E-02 |
| BNIP3 | -0.404 | 0.667 | 0.507  | 0.879  | 4.03E-03 |
| CAPN1 | -0.827 | 0.438 | 0.233  | 0.82   | 9.94E-03 |
| CD14  | 0.404  | 1.498 | 1.175  | 1.909  | 1.10E-03 |
| PRDM1 | -0.643 | 0.526 | 0.373  | 0.741  | 2.37E-04 |
| BST2  | 0.225  | 1.252 | 1      | 1.567  | 4.96E-02 |
| SDHB  | -0.544 | 0.581 | 0.315  | 1.07   | 8.14E-02 |
| TFAM  | 0.973  | 2.647 | 1.199  | 5.843  | 1.60E-02 |
| GSDMB | 0.307  | 1.359 | 0.972  | 1.902  | 7.32E-02 |
